# Supplementary material for: Colloidal three-dimensional covalent organic frameworks and their application as porous liquids
Source: Royal Society of Chemistry journal article supplement (doi:10.1039/d0ta06768g), 2020-01-01
Supplement: d0ta06768g1.pdf [file d0ta06768g1.pdf]

## Supporting Information

# Colloidal Three-Dimensional Covalent Organic Frameworks and Their Application as Porous Liquids

Rachel E. Mow,<sup>ab</sup> Andrew S. Lipton,<sup>c</sup> Sarah Shulda,<sup>b</sup> E. Ashley Gaulding,<sup>b</sup> Thomas Gennett,<sup>\*ab</sup> and Wade A. Braunecker<sup>\*ab</sup>

### Contents

|                                                                       |    |
|-----------------------------------------------------------------------|----|
| Chemical Structures and Synthetic Schematics . . . . .                | 2  |
| Summary of Colloidal Synthetic Conditions and Surface Areas . . . . . | 3  |
| Images of COF colloids and porous liquids . . . . .                   | 3  |
| Dynamic Light Scattering . . . . .                                    | 5  |
| X-Ray Diffraction . . . . .                                           | 6  |
| NMR . . . . .                                                         | 7  |
| Isotherms . . . . .                                                   | 9  |
| Pore Size Distributions . . . . .                                     | 11 |
| Diffuse Reflectance Infrared Fourier Transform Spectroscopy . . . . . | 12 |

---

\* Co-corresponding authors

<sup>a</sup> Department of Chemistry, Colorado School of Mines, Golden, CO 80401, United States. Fax: 303-273 3629; Tel: 303-273 3610

<sup>b</sup> National Renewable Energy Laboratory, Golden, CO 80401, United States. Tel: 303-275-3000

<sup>c</sup> Environmental Molecular Sciences Laboratory, Pacific Northwest National Laboratory, Richland, Washington 99354, United States

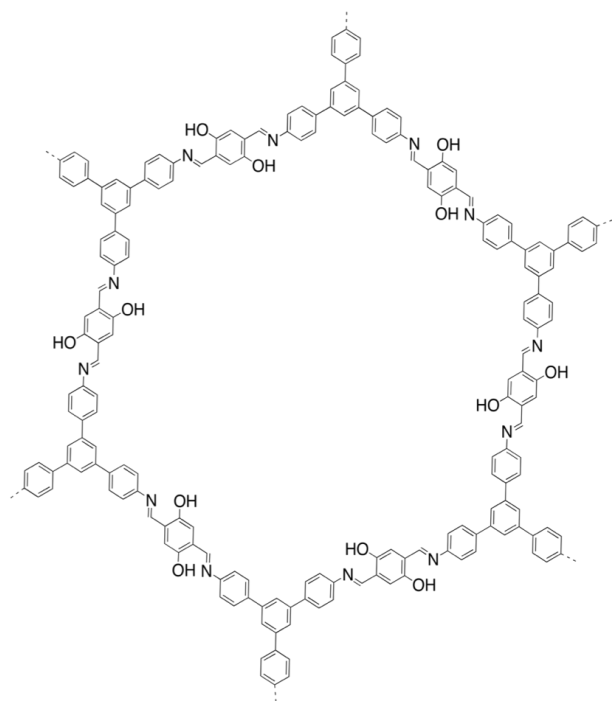

**Fig. S1** Structure of 2D COF with 37Å pores

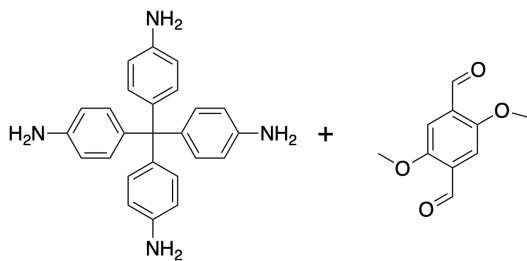

**Fig. S2** Monomers for the methoxy-functionalized COF

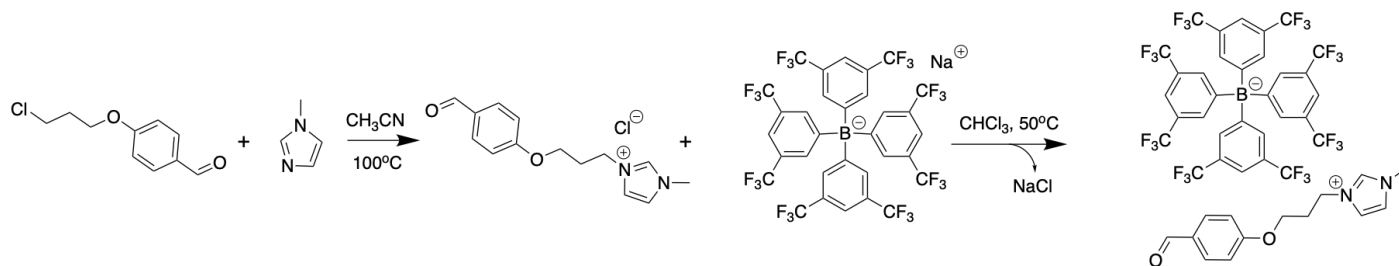

**Scheme S1** Synthesis of 3-(3-(4-formylphenoxy)propyl)-1-methyl-1H-imidazol-3-ium BARF

**Table S1** Summary of the synthetic conditions for COF-300 colloids – each reaction was done with 4.4 mM tetrakis(4-aminophenyl)methane in dry acetonitrile for 72 hours

| Catalyst                          | Temperature | Surface Area          |
|-----------------------------------|-------------|-----------------------|
| Sc(OTf) <sub>3</sub>              | RT          | 193 m <sup>2</sup> /g |
| Sc(OTf) <sub>3</sub>              | 90°C        | 377 m <sup>2</sup> /g |
| Sc(OTf) <sub>3</sub>              | 120°C       | black precipitate     |
| CF <sub>3</sub> CO <sub>2</sub> H | RT          | 34 m <sup>2</sup> /g  |
| CF <sub>3</sub> CO <sub>2</sub> H | 90°C        | 313 m <sup>2</sup> /g |
| CF <sub>3</sub> CO <sub>2</sub> H | 120°C       | 600 m <sup>2</sup> /g |

Images of COF colloids and porous liquids

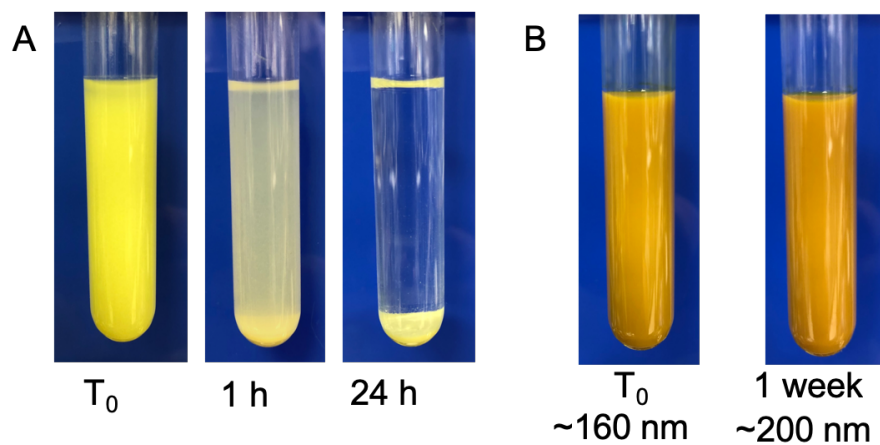

**Fig. S3** a) Large particle COF-300 (purified, dried, resuspended in acetonitrile) rapidly settles with time, compared to b) colloidal COF-300, which is stable towards flocculation over many weeks. DLS suggests average particle sizes slowly increase over the course of one week from 160 to 200 nm.

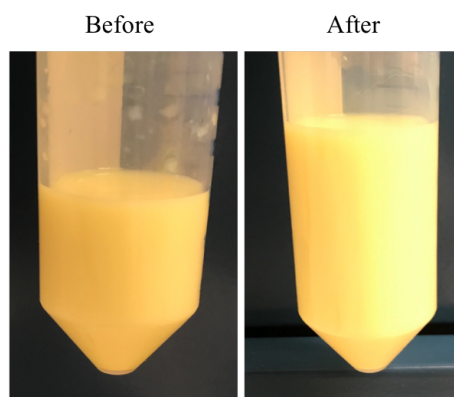

**Fig. S4** Stable colloidal suspension of BAR<sup>F</sup> functionalized COF in acetonitrile (left). Following centrifugation and vacuum to dryness, the functionalized material could be resuspended as a stable colloidal solution in acetonitrile (right).

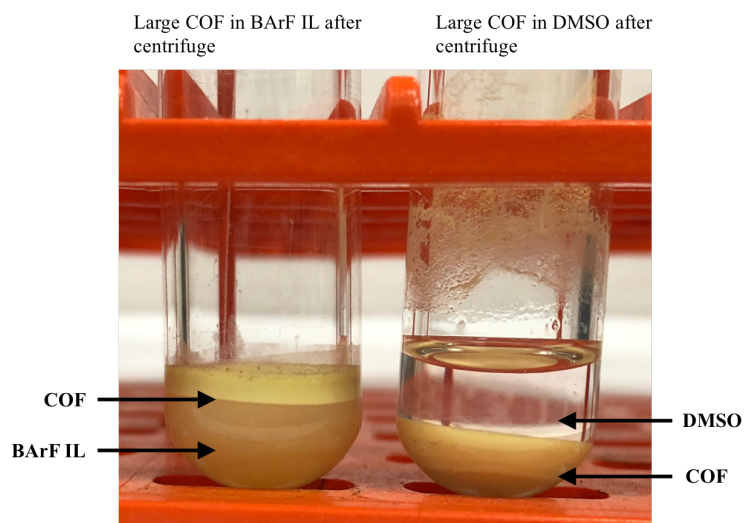

**Fig. S5** Separation of large-particle COF-300 from BAr<sup>F</sup> ionic liquid after 3 h of centrifugation at 6000 rpm (left) and 10 min of centrifugation in DMSO (right).

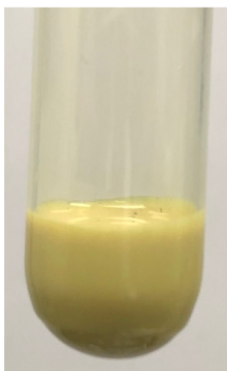

**Fig. S6** 10 wt.% porous liquid made from 200 nm COF-300 particles and BAr<sup>F</sup> ionic liquid, showing no visible separation after centrifugation at 6000 rpm for 5 hours.

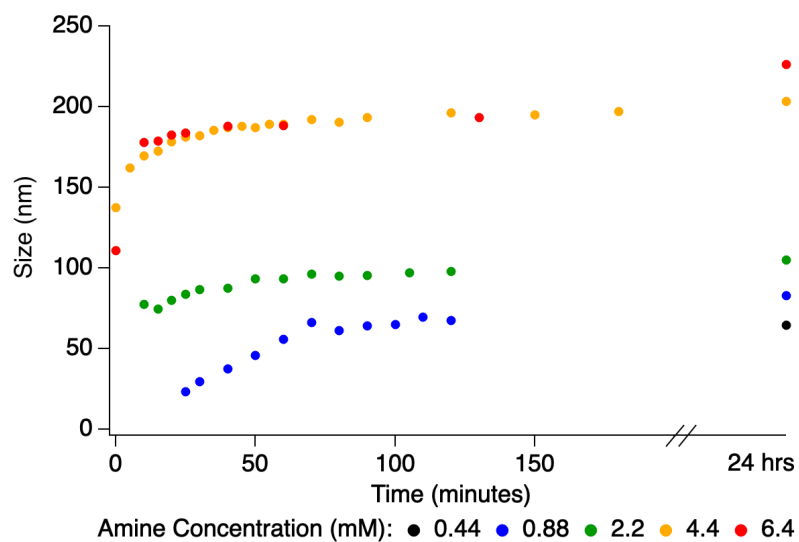

**Fig. S7** Average particle size distribution of COF-300 colloids with time, as monitored by DLS. Reaction was done in acetonitrile with  $\text{Sc}(\text{OTf})_3$  at room temperature. The concentrations reported are the concentration of tetrakis(4-aminophenyl)methane in acetonitrile. Aliquots were taken from the reaction, diluted with acetonitrile, and immediately measured with DLS.

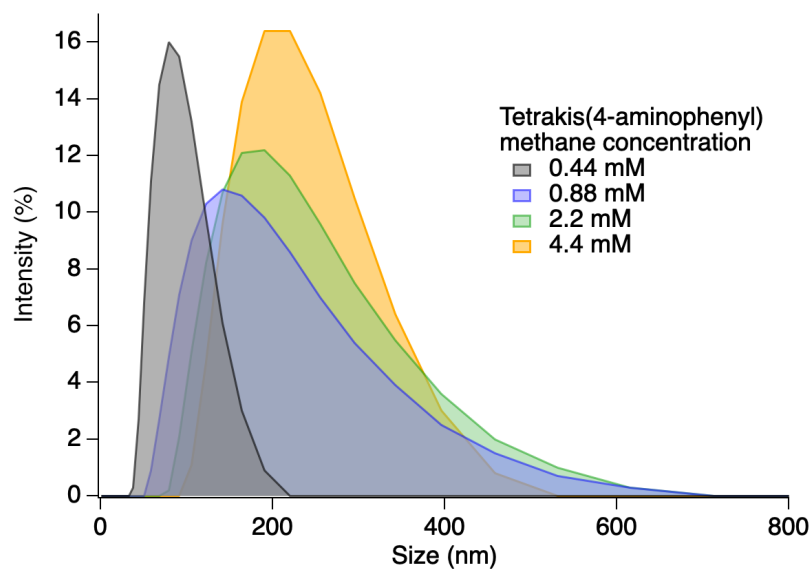

**Fig. S8** Effect of dilution on particle size distribution for COF-300 syntheses at 120°C in acetonitrile, catalyzed by trifluoroacetic acid.

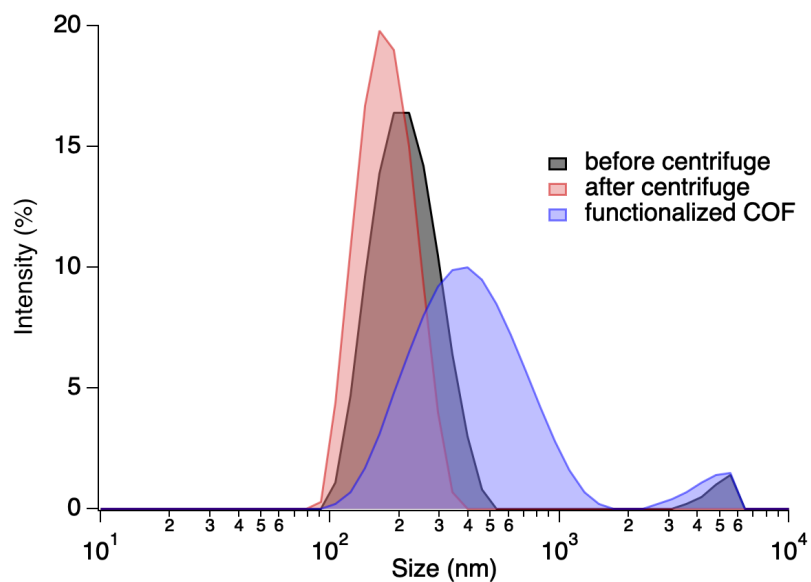

**Fig. S9** Particle size distributions for COF-300 synthesized at 120°C in acetonitrile with trifluoroacetic acid catalyst. The black trace shows the size distribution before the colloids were centrifuged and the red trace shows the size distribution after the colloids were centrifuged and resuspended in acetonitrile through ultrasonication, revealing no apparent irreversible aggregation occurs during centrifugation. The blue trace indicates the size distribution approximately doubles after functionalization with the  $\text{BAr}^{\text{F}}$  compound.

### X-Ray Diffraction

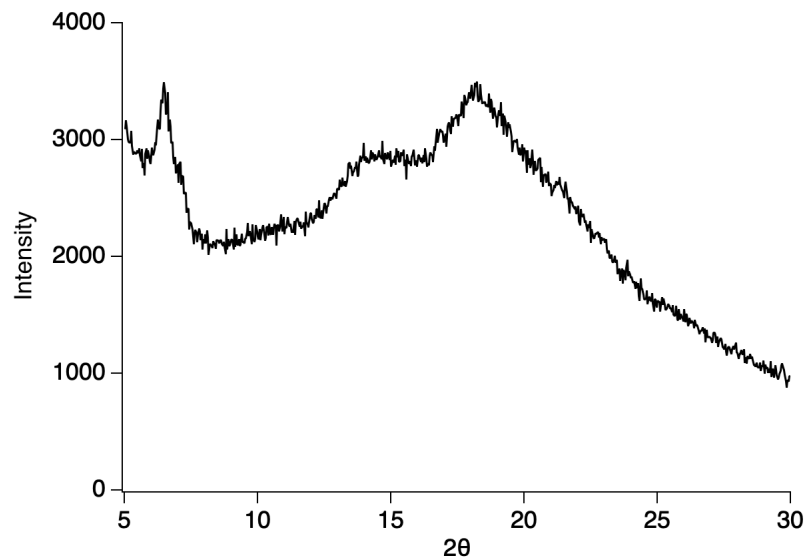

**Fig. S10** XRD of colloidal COF-300.



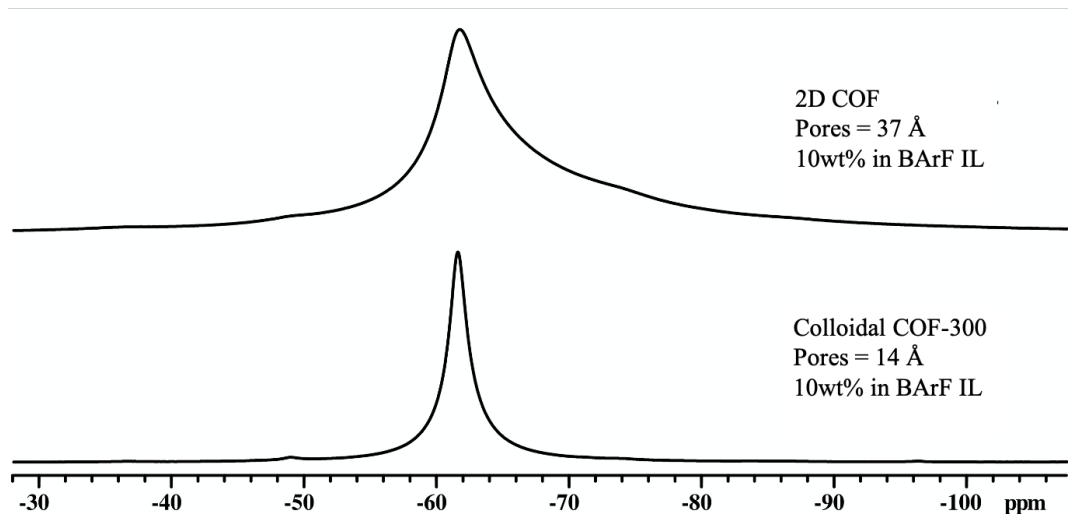

**Fig. S13**  $^{19}\text{F}$  MAS NMR spectra (799 MHz) acquired at 0°C for 10 wt.% COF suspensions in BAr<sup>F</sup> ionic liquid. The  $\text{CF}_3$  resonances of the BAr<sup>F</sup> anion are shown for the (top) 2D COF suspension with 37 Å pores and (bottom) COF-300 with 14 Å pores.



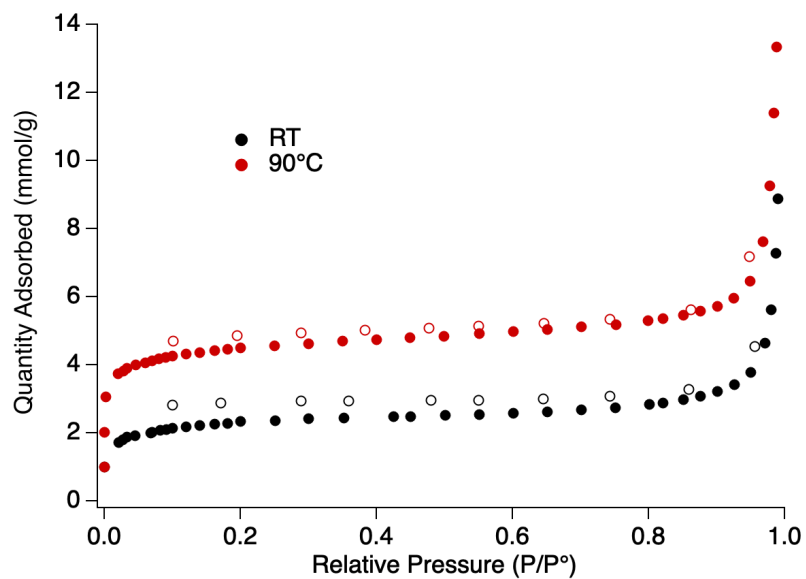

**Fig. S14** Nitrogen isotherms of colloidal COF-300 synthesized at room temperature (black) and 90°C (red) with Sc(OTf)<sub>3</sub>. Filled circles represent adsorption and open circles represent desorption. Surface Areas: RT = 193 +/- 1 m<sup>2</sup>/g and 90°C = 377 +/- 4 m<sup>2</sup>/g.

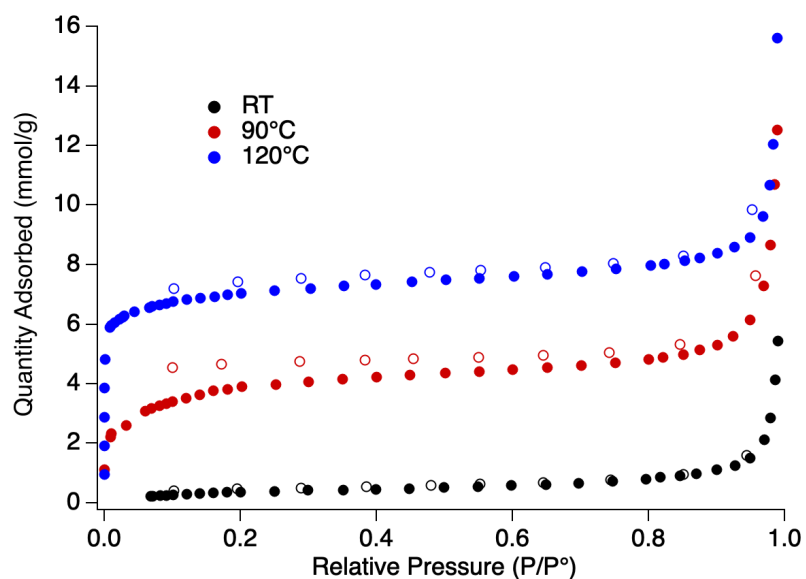

**Fig. S15** Nitrogen isotherms of colloidal COF-300 synthesized at room temperature (black), 90°C (red), and 120°C (blue) with trifluoroacetic acid. Filled circles represent adsorption and open circles represent desorption. Surface Areas: RT = 33.8 +/- 0.7 m<sup>2</sup>/g, 90°C = 313 +/- 4 m<sup>2</sup>/g, and 120°C = 601.2 +/- 0.4 m<sup>2</sup>/g.

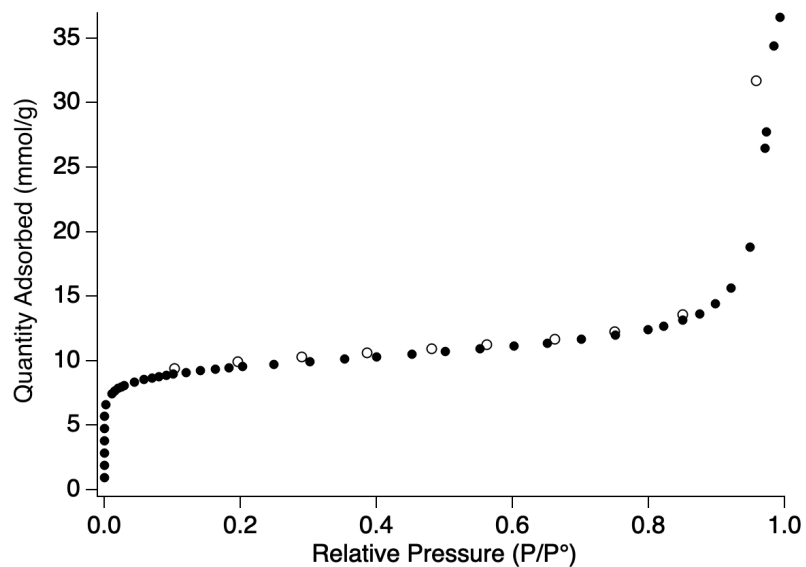

**Fig. S16** Nitrogen isotherm of methoxy-functionalized COF synthesized at 120°C with trifluoroacetic acid. Filled circles represent adsorption and open circles represent desorption. Surface Area = 783 +/- 8 m<sup>2</sup>/g.

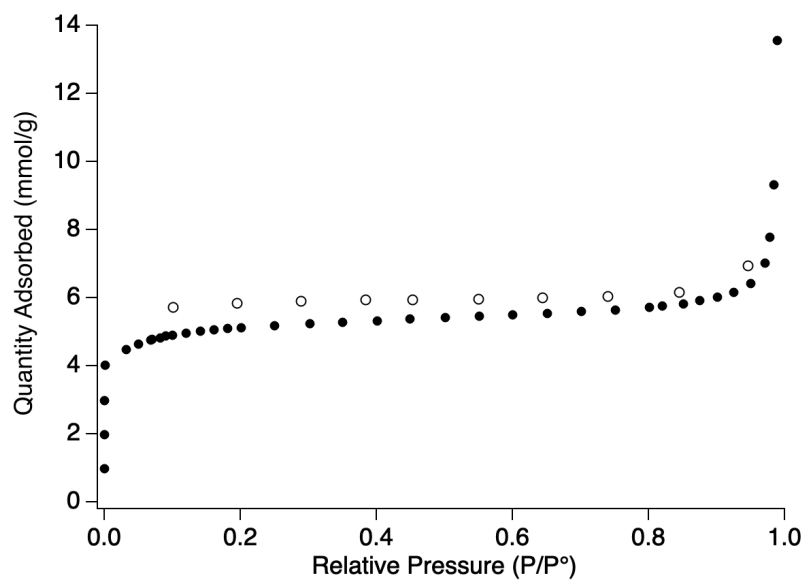

**Fig. S17** Nitrogen isotherm for COF-300 functionalized with the BA rF compound. Filled circles represent adsorption and open circles represent desorption. Surface Area = 433 +/- 3 m<sup>2</sup>/g.

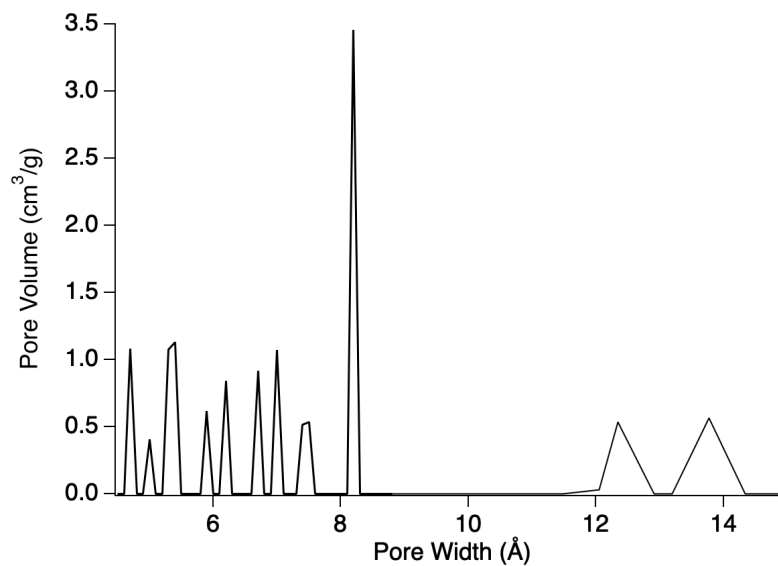

**Fig. S18** Pore size distribution of colloidal COF-300. The pore volume below 9 Å was collected with CO<sub>2</sub>, and above 9 Å was collected with nitrogen

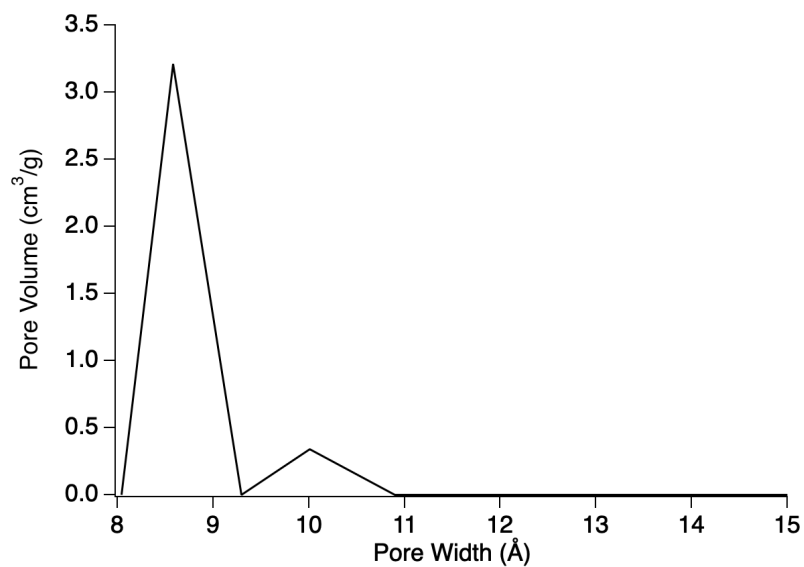

**Fig. S19** Pore size distribution for COF-300 functionalized with BA rF ionic liquid counter ion, collected with nitrogen adsorption

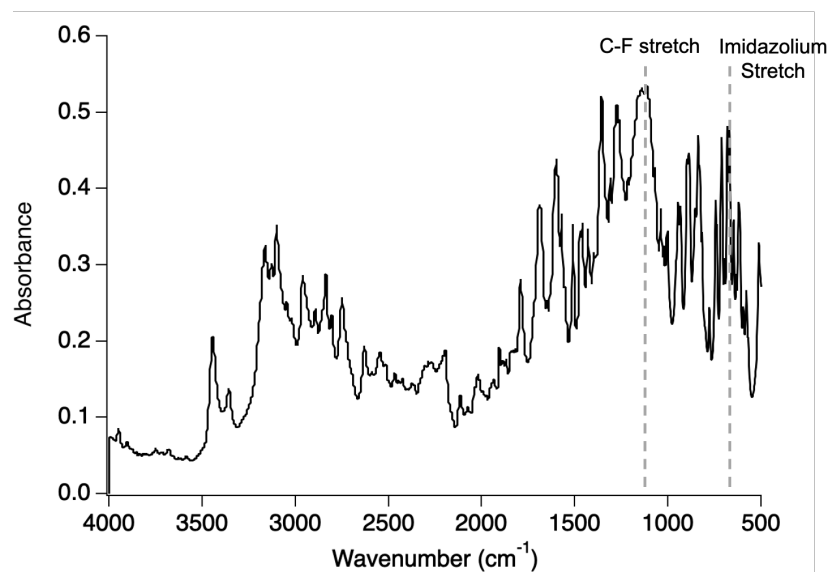

**Fig. S20** DRIFTS showing 3-(3-(4-formylphenoxy)propyl)-1-methyl-1H-imidazol-3-ium

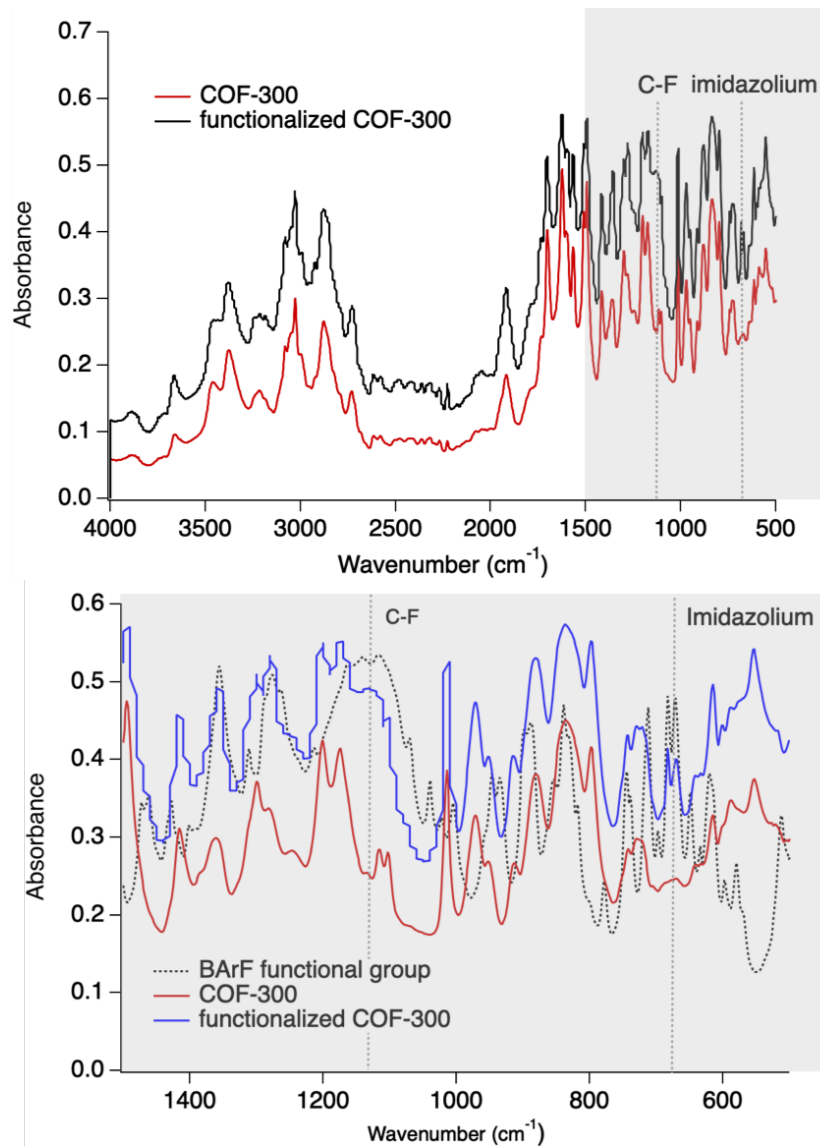

**Fig. S21** DRIFTS showing (a) the full spectrum and (b) a portion of the spectrum for COF-300 with and without functionalization. The stretch at 1150  $\text{cm}^{-1}$  represents C-F<sup>1</sup> and the stretch at 680  $\text{cm}^{-1}$  represents the imidazolium,<sup>2</sup> which are components of the 3-(3-(4-formylphenoxy)propyl)-1-methyl-1H-imidazol-3-ium, not the COF itself. This data proves successful functionalization of the COF with the tethered BAr<sup>F</sup> ionic liquid counter ion.

## Notes and references

- 1 Libretexts, *Infrared Spectroscopy Absorption Table*, 2019, [https://chem.libretexts.org/Bookshelves/Ancillary\\_Materials/Reference/Reference\\_Tables/Spectroscopic\\_Parameters/Infrared\\_Spectroscopy\\_Absorption\\_Table](https://chem.libretexts.org/Bookshelves/Ancillary_Materials/Reference/Reference_Tables/Spectroscopic_Parameters/Infrared_Spectroscopy_Absorption_Table).
- 2 *1H-Imidazole, 1-methyl*, <https://webbook.nist.gov/cgi/cbook.cgi?ID=C616477&Mask=80#IR-Spec>.
